# Supplementary material for: Tree Species and Epiphyte Taxa Determine the “Metabolomic niche” of Canopy Suspended Soils in a Species-Rich Lowland Tropical Rainforest
Source: MDPI journal article supplement (doi:10.3390/metabo11110718), 2021-10-21
Supplement: s1 [file s1]

## SUPPLEMENTARY MATERIAL

**Table S1.** Processing parameters of LC-MS chromatograms using MzMine 2.0 (Pluskal et al., 2010). Chromatogram represents by the total ion current (TIC).

|          |                                                          | (+H) Chromatograms                                      | (-H) Chromatograms                                        |
|----------|----------------------------------------------------------|---------------------------------------------------------|-----------------------------------------------------------|
| <b>1</b> | <b>Baseline correction</b>                               |                                                         |                                                           |
|          | Chromatogram type                                        | TIC                                                     | TIC                                                       |
|          | MS level                                                 | 1                                                       | 1                                                         |
|          | Smoothing                                                | 10E6                                                    | 10E6                                                      |
|          | Asymmetry                                                | 0.001                                                   | 0.001                                                     |
| <b>2</b> | <b>Mass detection (Exact Mass )</b>                      |                                                         |                                                           |
|          | Noise level                                              | $4.5 \times 10^5$                                       | $4.5 \times 10^5$                                         |
| <b>3</b> | <b>Chromatogram builder</b>                              |                                                         |                                                           |
|          | Min time span                                            | 0.05                                                    | 0.05                                                      |
|          | Min height                                               | 25000                                                   | 25000                                                     |
|          | m/z tolerance                                            | 0.002                                                   | 0.002                                                     |
| <b>4</b> | <b>Smoothing</b>                                         |                                                         |                                                           |
|          | Filter width                                             | 5                                                       | 5                                                         |
| <b>5</b> | <b>Chromatogram deconvolution (Local minimum search)</b> |                                                         |                                                           |
|          | Chromatographic threshold                                | 70%                                                     | 70%                                                       |
|          | Search minimum in RT range (min)                         | 0.1                                                     | 0.1                                                       |
|          | Minimum relative height                                  | 7.0%                                                    | 7.0%                                                      |
|          | Minimum absolute height                                  | 30000                                                   | 30000                                                     |
|          | Min ratio of peak top/edge                               | 2                                                       | 2                                                         |
|          | Peak duration range                                      | 0.0-2.0                                                 | 0.0-2.0                                                   |
| <b>6</b> | <b>Chromatogram alignment (join alignment)</b>           |                                                         |                                                           |
|          | m/z tolerance                                            | 0.001                                                   | 0.001                                                     |
|          | weight for m/z                                           | 80                                                      | 80                                                        |
|          | RT tolerance                                             | 0.3                                                     | 0.3                                                       |
|          | Weight for RT                                            | 20                                                      | 20                                                        |
| <b>7</b> | <b>Gap filling (Peak Finder)</b>                         |                                                         |                                                           |
|          | Intensity tolerance                                      | 20%                                                     | 20%                                                       |
|          | m/z tolerance                                            | 0.001                                                   | 0.001                                                     |
|          | Retention time tolerance                                 | 0.1                                                     | 0.1                                                       |
|          | RT correction                                            | marked                                                  | marked                                                    |
| <b>8</b> | <b>Filtering</b>                                         |                                                         |                                                           |
|          | Minimum peaks in a row                                   | 25                                                      | 25                                                        |
|          |                                                          |                                                         |                                                           |
|          | <b>Ions excluded from database</b>                       | <75<br>Between 0.0 and 1 min<br>Between 28.5 and 30 min | <85<br>Between 0.0 and 1,1 min<br>Between 27.0 and 30 min |

“

# Pathway enrichment analysis floor soil versus suspended soil without epiphytes

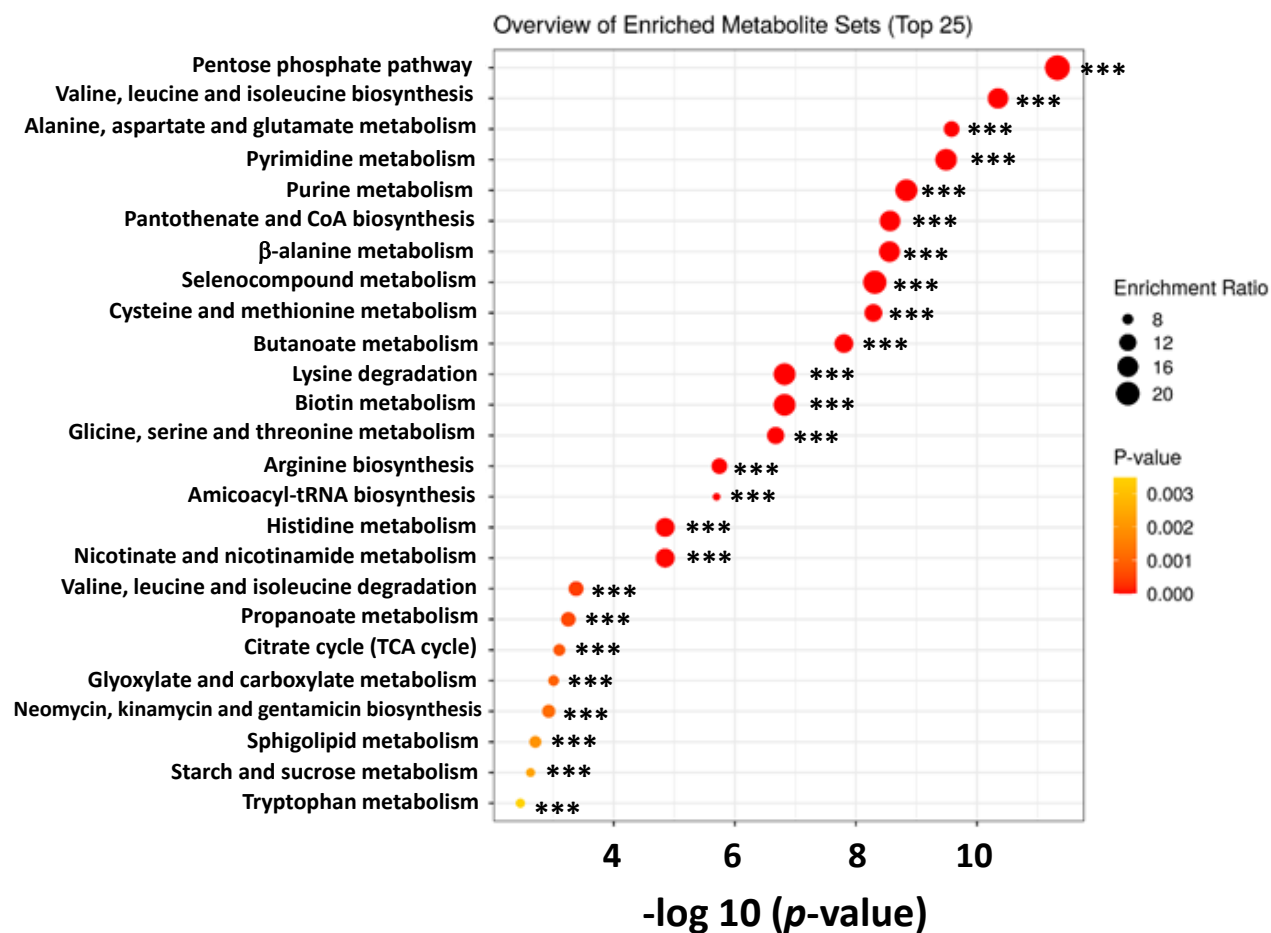

Figure S1. Enrichment pathway analysis of soil metabolomics profile versus suspended soils without epiphytes. \*\*\* ( $P < 0.001$ ).
